# Supplementary material for: Mode of delivery and short-term infant health outcomes: a prospective cohort study in a peri-urban Indian population
Source: PubMed Central journal article supplement (PMC6220445; doi:10.1186/s12887-018-1324-3), 2018-11-06
Supplement: 12887_2018_1324_MOESM1_ESM.pdf [file 12887_2018_1324_MOESM1_ESM.pdf]

Table S1 Maternal pre-delivery characteristics by mode of delivery and standardized bias before and after weighting

| Characteristic                                                             | Vaginal Delivery | Cesarean Delivery | Unweighted Standardized Bias <sup>†</sup> | Weighted Standardized Bias <sup>†</sup> |
|----------------------------------------------------------------------------|------------------|-------------------|-------------------------------------------|-----------------------------------------|
|                                                                            | n=454<br>n(%)    | n=397<br>n(%)     |                                           |                                         |
| <b>Pre-pregnancy</b>                                                       |                  |                   |                                           |                                         |
| BMI (Mean kg/m <sup>2</sup> (Std. Dev))                                    | 19.5 (2.9)       | 20.6 (3.6)        | 0.34                                      | -0.04                                   |
| Multiparous                                                                | 349 (81)         | 286 (78)          | -0.09                                     | -0.03                                   |
| <b>Level of education</b>                                                  |                  |                   |                                           |                                         |
| None                                                                       | 68 (15)          | 46 (12)           | 0.23                                      | 0.09                                    |
| Primary                                                                    | 126 (28)         | 88 (22)           |                                           |                                         |
| Secondary                                                                  | 227 (50)         | 213 (54)          |                                           |                                         |
| Higher education                                                           | 33 (7)           | 50 (13)           |                                           |                                         |
| <b>Prenatal</b>                                                            |                  |                   |                                           |                                         |
| First trimester prenatal vitamin use                                       | 111(26)          | 152(42)           | 0.33                                      | -0.05                                   |
| Diagnosed with feet swelling during third trimester                        | 25(5.7)          | 37(9.7)           | 0.15                                      | -0.12                                   |
| Not able to do regular duties due to illness/injury during third trimester | 8(1.8)           | 17(4.5)           | 0.15                                      | 0.05                                    |
| Prenatal vaginal bleeding                                                  | 5(1.2)           | 14(3.8)           | 0.17                                      | -0.17                                   |
| <b>Delivery</b>                                                            |                  |                   |                                           |                                         |
| Age at delivery                                                            | 22.9 (2.9)       | 23.5 (3.1)        | 0.20                                      | -0.05                                   |
| One or more labor and delivery complications                               | 42(9.3)          | 142(36)           | 0.67                                      | -0.05                                   |

<sup>†</sup> Standardized bias = difference in means or proportions divided by standard error; imbalance defined as an absolute value >0.25
