# Supplementary material for: Mode of delivery and short-term infant health outcomes: a prospective cohort study in a peri-urban Indian population
Source: PubMed Central journal article supplement (PMC6220445; doi:10.1186/s12887-018-1324-3), 2018-11-06
Supplement: 12887_2018_1324_MOESM2_ESM.pdf [file 12887_2018_1324_MOESM2_ESM.pdf]

**Table S2 The association between mode of delivery and infant health outcomes at six month follow-up in the LIFE study, adjusting for pre-delivery maternal factors and postpartum covariates**

|                                                  | ≥1 outcome at 6 months<br>(Diarrhea, difficulty breathing, or respiratory infection) |                         | Comorbid diarrhea and respiratory infection at 6 months |                         |
|--------------------------------------------------|--------------------------------------------------------------------------------------|-------------------------|---------------------------------------------------------|-------------------------|
|                                                  | Unadjusted RR (95% CI)                                                               | Weighted * aRR (95% CI) | Unadjusted RR (95% CI)                                  | Weighted * aRR (95% CI) |
| Cesarean vs Vaginal delivery                     | 0.88 (0.77-1.01)                                                                     | 0.88 (0.76-1.03)        | 0.91 (0.52-1.62)                                        | 0.94 (0.48-1.85)        |
| Infant sex: girl vs boy                          | 0.95 (0.83-1.09)                                                                     | 0.91 (0.78-1.06)        | 1.74 (0.96-3.14)                                        | 1.71 (0.84-3.48)        |
| Infant breastfed 2+ hours after birth vs <1 hour | 0.99 (0.85-1.15)                                                                     | 0.87 (0.74-1.03)        | 1.87 (1.03-3.37)                                        | 1.55 (0.79-3.03)        |
| <i>Diaper/Waste disposal method</i>              |                                                                                      |                         |                                                         |                         |
| Put/rinsed into toilet or latrine                | 1.17 (0.90- 1.52)                                                                    | 1.17 (0.88-1.56)        | 1.76 (0.67-4.64)                                        | 1.57 (0.48-5.18)        |
| Put/ rinsed into open drain or ditch             | 1.20 (0.94- 1.55)                                                                    | 1.19 (0.90- 1.56)       | 1.35 (0.51-3.57)                                        | 1.39 (0.43-4.49)        |
| Buried                                           | 0.88 (0.67- 1.16)                                                                    | 0.78 (0.57- 1.06)       | 0.18 (0.04-0.93)                                        | 0.09 (0.008-1.15)       |
| Thrown into garbage                              | Ref.                                                                                 | Ref.                    | Ref.                                                    | Ref.                    |
| Left in the open                                 | 1.16 (0.88- 1.55)                                                                    | 1.12 (0.81- 1.54)       | 0.67 (0.18-2.42)                                        | 0.67 (0.14-3.09)        |

\* Variables incorporated in weight: pre-pregnancy BMI, Parity, Level of education; First trimester prenatal vitamin use, Diagnosed with feet swelling during third trimester, Not able to do regular duties due to illness/injury during third trimester, Prenatal vaginal bleeding; Age at delivery, one or more labor and delivery complications
